# Supplementary material for: DNA methylation at modifier genes of lung disease severity is altered in cystic fibrosis
Source: PubMed Central journal article supplement (PMC5310067; doi:10.1186/s13148-016-0300-8), 2017-02-14

### NEC

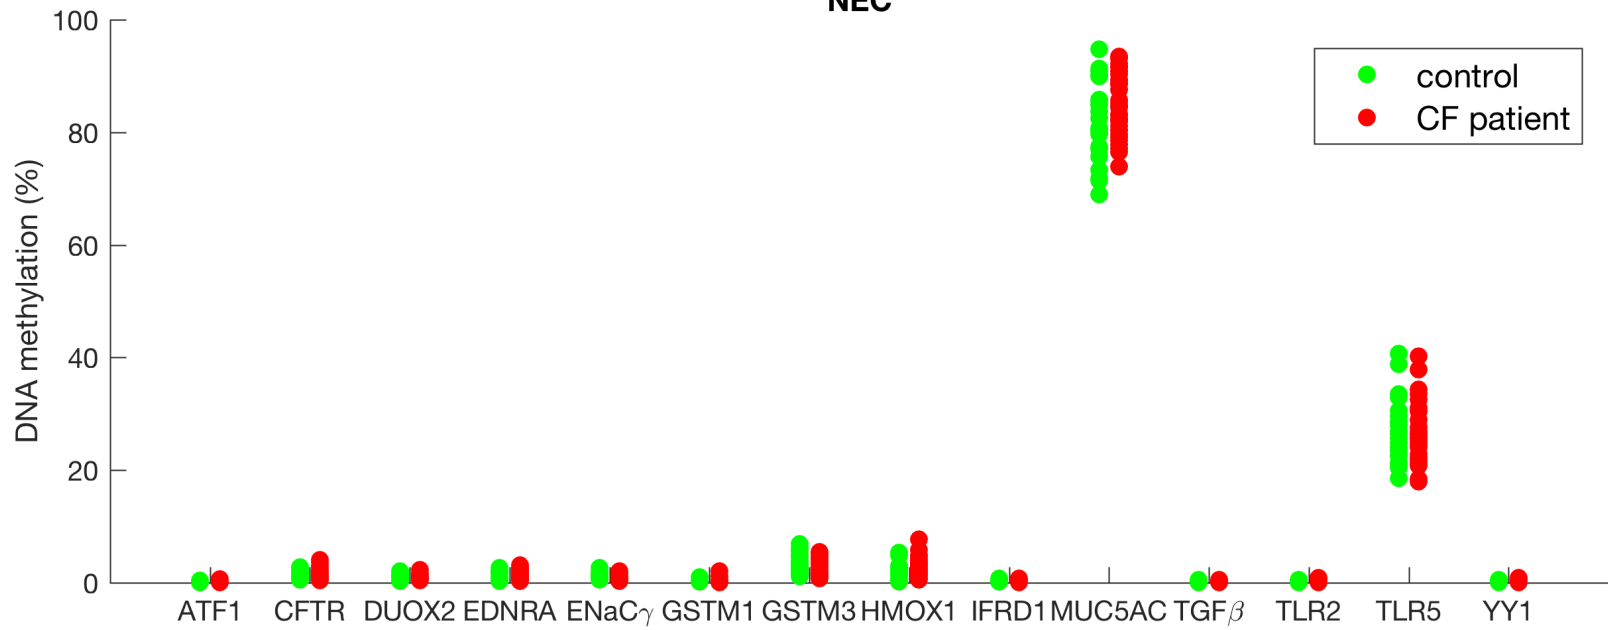

### blood

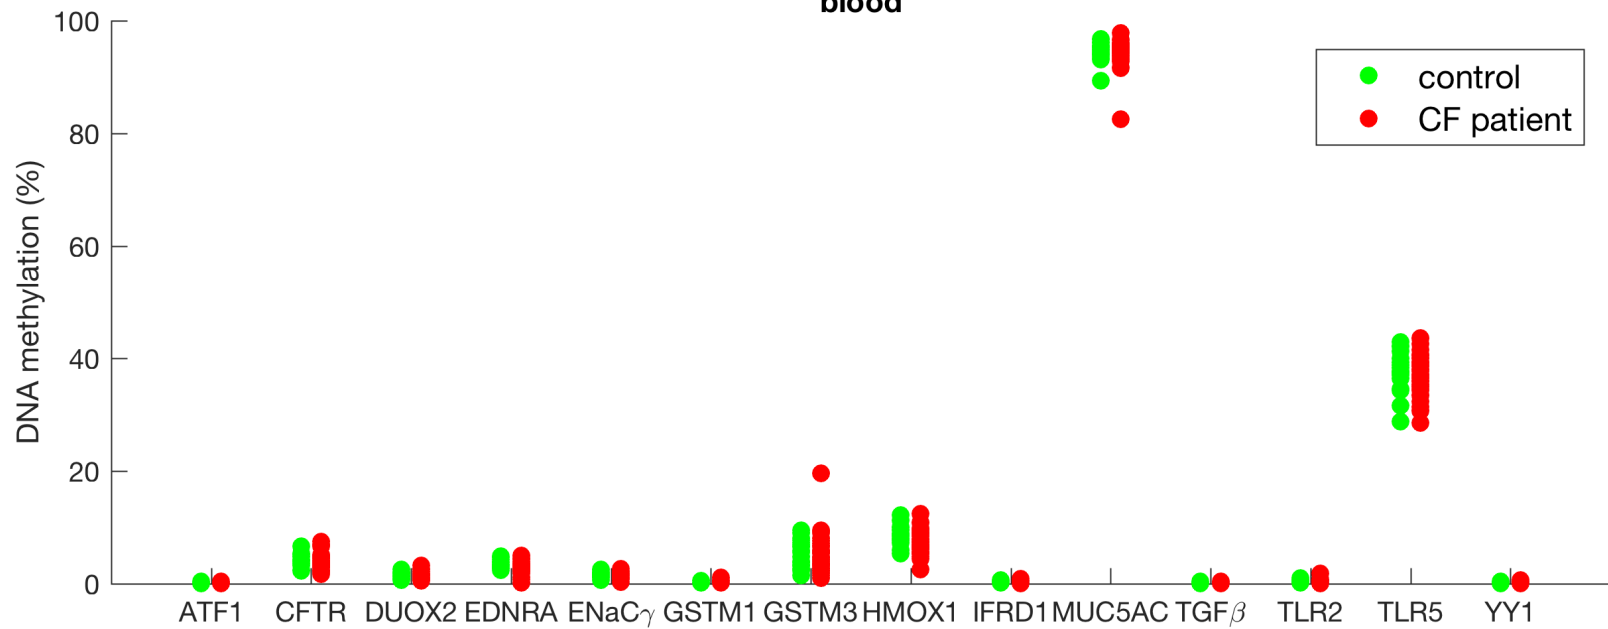

Supplement: 13148_2016_300_MOESM2_ESM.pdf [file 13148_2016_300_MOESM2_ESM.pdf]
